# Supplementary material for: Associations between plasma concentrations of lenvatinib and angiopoietin and clinical responses to lenvatinib therapy in Japanese patients with thyroid cancer
Source: Research Square preprint supplement (doi:10.21203/rs.3.rs-828572/v2), 2021-10-14
Supplement: Supplementary file 1 [file e8abdf80ce9099cefd34ce49.xlsx]

## Sheet: Table 2
Table 2. Association between plasma concentration of angiopoietin-1, -2 and kenvatinib and presence of continuation of lenvatinib therapy during 1 year
Lenvatinib therapy		Continuous therapy for 1 year							Withdrawal at less than 1 year							P-values
Number				18							18
		Median	(	Q1	-	Q3	)		Median	(	Q1	-	Q3	)
Age		67	(	57.8	-	72	)		68	(	59	-	74	)		0.584
Female : Male		10 : 8							13 : 5							0.489
PTC/FTC/MTC/PDTC/ATC		9/5/0/4/0							4/3/1/0/10							0.002
Angiopoietin-1
Before lenvatinib therapy (baseline) (pg/mL)		6459	(	4311	-	7209	)		6833	(	5250	-	8750	)		0.118
1 month after lenvatinib treatment (pg/mL)		5750	(	4146	-	7250	)		5417	(	4667	-	6083	)	**	0.406
1 year after lenvatinib treatment (pg/mL)		5625	(	4490	-	7458	)
Change on 1 month from baseline (%)		-9.2	(	-19.8	-	10.1	)		-25.1	(	-34.0	-	1.6	)		0.068
Change on 1 year from baseline (%)		3.3	(	-18.0	-	20.4	)
Angiopoietin-2
Before lenvatinib therapy (baseline) (pg/mL)		1590	(	1375	-	2237	)		1773	(	1205	-	2986	)		1
1 month after lenvatinib treatment (pg/mL)		968	(	687	-	1245	)	***	936	(	830	-	1649	)	*	0.673
1 year after lenvatinib treatment (pg/mL)		1015	(	887	-	1394	)	***
Change on 1 month from baseline (%)		-51.0	(	-60.0	-	-35.2	)		-46.1	(	-58.2	-	-16.1	)		0.501
Change on 1 year from baseline (%)		-40.2	(	-53.8	-	-29.1	)
Angiopoietin-2/angiopoietin-1 ratio
Before lenvatinib therapy (baseline)		0.3	(	0.19	-	0.52	)		0.28	(	0.2	-	0.42	)		0.584
1 month after lenvatinib treatment		0.13	(	0.12	-	0.35	)	***	0.22	(	0.13	-	0.33	)		0.443
1 year after lenvatinib treatment		0.19	(	0.14	-	0.25	)	***
Lenvatinib
C0 on 1 month after lenvatinib treatment (ng/mL)		82	(	64.7	-	181	)		108	(	58.3	-	152	)		0.606
C0 on 1 year after lenvatinib treatment (ng/mL)		59.7	(	37	-	113	)	##
PTC/FTC		9/5							4/3							1
Angiopoietin 1
Before lenvatinib therapy (baseline) (pg/mL)		6459	(	4224	-	8083	)		6833	(	5250	-	8750	)		0.322
1 month after lenvatinib treatment (pg/mL)		6084	(	3771	-	7250	)		5326	(	4917	-	6648	)		0.743
Change on 1 month from baseline (%)		-10.8	(	-19.8	-	4.9	)		-28.0	(	-42.9	-	4.4	)		0.172
Angiopoietin 2
Before lenvatinib therapy (baseline) (pg/mL)		1790	(	1448	-	2237	)		1752	(	1399	-	3493	)		0.799
1 month after lenvatinib treatment (pg/mL)		999	(	754	-	1387	)	***	1212	(	886	-	11305	)		0.197
Change on 1 month from baseline (%)		-45.9	(	-54.4	-	-27.5	)		-30.0	(	-49.4	-	230	)		0.197
Q: quartile
PTC: papillary thyroid cancer, FTC: follicular thyroid cancer, MTC: medullary thyroid cancer, PDTC: poorly differentiated thyroid cancer, ATC: anaplastic thyroid cancer
* P< 0.05, ** P<0.01, *** P<0.001 vs baseline
## P<0.01 vs 1 month after lenvatinib therapy
