# Supplementary material for: Associations between plasma concentrations of lenvatinib and angiopoietin and clinical responses to lenvatinib therapy in Japanese patients with thyroid cancer
Source: Research Square preprint supplement (doi:10.21203/rs.3.rs-828572/v2), 2021-10-14
Supplement: Supplementary file 2 [file f34686587d5d4480c49cae8a.xlsx]

## Sheet: Table 1
Table 1. Association between plasma concentration of angiopoietin-1, -2 and kenvatinib and clinical response after lenvatinib therapy
Best response		Partial response							Stable disease							Progressive disease						P-values
Number				23							8							5
		Median	(	Q1	-	Q3	)		Median	(	Q1	-	Q3	)		Median	(	Q1	-	Q3	)
Age		68	(	61	-	71	)		62.5	(	51.8	-	75.8	)		71	(	58	-	75.5	)	0.733
Female : Male		14 : 9							5 : 3							4 : 1						0.747
PTC/FTC/MTC/PDTC/ATC		9/4/1/4/5							3/3/0/0/2							1/1/0/0/3						0.708
Angiopoietin-1
Before lenvatinib therapy (baseline) (pg/mL)		6667	(	4833	-	8083	)		6083	(	4653	-	8146	)		6833	(	5334	-	8500	)	0.739
1 month after lenvatinib treatment (pg/mL)		5417	(	3833	-	6333	)	**	6250	(	5349	-	7145	)		5750	(	3792	-	6500	)	0.395
1 year after lenvatinib treatment (pg/mL)		5542	(	4490	-	7188	)		7250	(	4792	-	8395	)								0.442
Change on 1 month from baseline (%)		-16.7	(	-29.3	-	1.6	)		-2.9	(	-19.3	-	33.5	)		-28.0	(	-40.2	-	4.6	)	0.192
Change on 1 year from baseline (%)		4.1	(	-18.1	-	20.4	)		2	(	-15.2	-	31	)								0.878
Angiopoietin-2
Before lenvatinib therapy (baseline) (pg/mL)		1773	(	1343	-	2918	)		1570	(	1472	-	1928	)		2136	(	1080	-	2887	)	0.77
1 month after lenvatinib treatment (pg/mL)		1005	(	651	-	1517	)	***	893	(	790	-	1007	)	*	936	(	780	-	11408	)	0.632
1 year after lenvatinib treatment (pg/mL)		1046	(	851	-	1460	)	**	1015	(	936	-	1387	)								0.878
Change on 1 month from baseline (%)		-51.8	(	-60.5	-	-40.7	)		-39.8	(	-62.4	-	-31.9	)		-12.1	(	-49.2	-	313	)	0.081
Change on 1 year from baseline (%)		-40.2	(	-59.3	-	-29.1	)		-36.9	(	-47.3	-	-11.6	)								0.442
Angiopoietin-2/angiopoietin-1 ratio
Before lenvatinib therapy (baseline)		0.31	(	0.2	-	0.51	)		0.25	(	0.21	-	0.32	)		0.33	(	0.13	-	0.53	)	0.625
1 month after lenvatinib treatment		0.17	(	0.13	-	0.35	)	***	0.15	(	0.13	-	0.2	)	*	0.16	(	0.12	-	3.31	)	0.625
1 year after lenvatinib treatment		0.2	(	0.14	-	0.28	)	**	0.17	(	0.13	-	0.21	)								0.442
Lenvatinib
C0 on 1 month after lenvatinib treatment (ng/mL)		71.2	(	64.4	-	164	)		130	(	58.8	-	209	)		108	(	54	-	144	)	0.598
C0 on 1 year after lenvatinib treatment (ng/mL)		49.7	(	37	-	113	)	##	77.2	(	30.7	-	138	)								0.721
Daily dose on 1 month after lenvatinib treatment (mg)		20	(	20	-	24	)		24	(	16.5	-	24	)		14	(	12	-	22	)	0.119
Daily dose on 1 year after lenvatinib treatment (mg)		10	(	9.5	-	14.5	)	##	11	(	8	-	14	)								0.721
Q: quartile
PTC: papillary thyroid cancer, FTC: follicular thyroid cancer, MTC: medullary thyroid cancer, PDTC: poorly differentiated thyroid cancer, ATC: anaplastic thyroid cancer
* P< 0.05, ** P<0.01, *** P<0.001 vs baseline
## P<0.01 vs 1 month after lenvatinib therapy
